# Supplementary material for: Clinical Validation of Cardiac Arrest Hospital Prognosis (CAHP) Score and MIRACLE2 Score to Predict Neurologic Outcomes after Out-of-Hospital Cardiac Arrest
Source: MDPI journal article supplement (doi:10.3390/healthcare10030578), 2022-03-20
Supplement: s1 [file s1]

**Table S1 STROBE Statement—Checklist of items that should be included in reports**

| Item                         |     |                                                                                                                                                                                      | Yes/No |
|------------------------------|-----|--------------------------------------------------------------------------------------------------------------------------------------------------------------------------------------|--------|
|                              | No  | Recommendation                                                                                                                                                                       |        |
| Title and abstract           | 1   | (a) Indicate the study’s design with a commonly used term in the title or the abstract                                                                                               | Yes    |
|                              |     | (b) Provide in the abstract an informative and balanced summary of what was done and what was found                                                                                  | Yes    |
| Introduction                 |     |                                                                                                                                                                                      |        |
| Background/rationale         | 2   | Explain the scientific background and rationale for the investigation being reported                                                                                                 | Yes    |
| Objectives                   | 3   | State specific objectives, including any prespecified hypotheses                                                                                                                     | Yes    |
| Methods                      |     |                                                                                                                                                                                      |        |
| Study design                 | 4   | Present key elements of study design early in the paper                                                                                                                              | Yes    |
| Setting                      | 5   | Describe the setting, locations, and relevant dates, including periods of recruitment, exposure, follow-up, and data collection                                                      | Yes    |
| Participants                 | 6   | (a) Give the eligibility criteria, and the sources and methods of selection of participants                                                                                          | Yes    |
| Variables                    | 7   | Clearly define all outcomes, exposures, predictors, potential confounders, and effect modifiers. Give diagnostic criteria, if applicable                                             | Yes    |
| Data sources/<br>measurement | 8*  | For each variable of interest, give sources of data and details of methods of assessment (measurement). Describe comparability of assessment methods if there is more than one group | Yes    |
| Bias                         | 9   | Describe any efforts to address potential sources of bias                                                                                                                            | Yes    |
| Study size                   | 10  | Explain how the study size was arrived at                                                                                                                                            | Yes    |
| Quantitative<br>variables    | 11  | Explain how quantitative variables were handled in the analyses. If applicable, describe which groupings were chosen and why                                                         | Yes    |
| Statistical methods          | 12  | (a) Describe all statistical methods, including those used to control for confounding                                                                                                | Yes    |
|                              |     | (b) Describe any methods used to examine subgroups and interactions                                                                                                                  | Yes    |
|                              |     | (c) Explain how missing data were addressed                                                                                                                                          | Yes    |
|                              |     | (d) If applicable, describe analytical methods taking account of sampling strategy                                                                                                   | Yes    |
|                              |     | (e) Describe any sensitivity analyses                                                                                                                                                | Yes    |
| Results                      |     |                                                                                                                                                                                      |        |
| Participants                 | 13* | (a) Report numbers of individuals at each stage of study—eg numbers potentially eligible, examined for eligibility,                                                                  | Yes    |

|                          |     |                                                                                                                                                                                                              |     |
|--------------------------|-----|--------------------------------------------------------------------------------------------------------------------------------------------------------------------------------------------------------------|-----|
|                          |     | confirmed eligible, included in the study, completing follow-up, and analysed                                                                                                                                |     |
|                          |     | (b) Give reasons for non-participation at each stage                                                                                                                                                         | Yes |
|                          |     | (c) Consider use of a flow diagram                                                                                                                                                                           | Yes |
| Descriptive data         | 14* | (a) Give characteristics of study participants (eg demographic, clinical, social) and information on exposures and potential confounders                                                                     | Yes |
|                          |     | (b) Indicate number of participants with missing data for each variable of interest                                                                                                                          | Yes |
| Outcome data             | 15* | Report numbers of outcome events or summary measures                                                                                                                                                         | Yes |
| Main results             | 16  | (a) Give unadjusted estimates and, if applicable, confounder-adjusted estimates and their precision (eg, 95% confidence interval). Make clear which confounders were adjusted for and why they were included | Yes |
|                          |     | (b) Report category boundaries when continuous variables were categorized                                                                                                                                    | Yes |
|                          |     | (c) If relevant, consider translating estimates of relative risk into absolute risk for a meaningful time period                                                                                             | Yes |
| Other analyses           | 17  | Report other analyses done—eg analyses of subgroups and interactions, and sensitivity analyses                                                                                                               | Yes |
| <b>Discussion</b>        |     |                                                                                                                                                                                                              |     |
| Key results              | 18  | Summarise key results with reference to study objectives                                                                                                                                                     | Yes |
| Limitations              | 19  | Discuss limitations of the study, taking into account sources of potential bias or imprecision. Discuss both direction and magnitude of any potential bias                                                   | Yes |
| Interpretation           | 20  | Give a cautious overall interpretation of results considering objectives, limitations, multiplicity of analyses, results from similar studies, and other relevant evidence                                   | Yes |
| Generalisability         | 21  | Discuss the generalisability (external validity) of the study results                                                                                                                                        | Yes |
| <b>Other information</b> |     |                                                                                                                                                                                                              |     |
| Funding                  | 22  | Give the source of funding and the role of the funders for the present study and, if applicable, for the original study on which the present article is based                                                | Yes |

**Table S2** Univariate analyses for favorable neurologic outcome

| Variables             | OR     | 95% CI |         | p      |
|-----------------------|--------|--------|---------|--------|
| Public location       | 1.597  | 0.726  | 3.514   | 0.244  |
| Witness               | 0.511  | 0.226  | 1.156   | 0.107  |
| Bystander CPR         | 0.775  | 0.346  | 1.738   | 0.537  |
| Shockable rhyme       | 3.901  | 1.285  | 11.846  | 0.016  |
| MIRACLE <sub>2</sub>  | 0.557  | 0.412  | 0.753   | <0.001 |
| CAHP                  | 0.974  | 0.963  | 0.985   | <0.001 |
| Epinephrine dose (mg) | 0.896  | 0.809  | 0.992   | 0.034  |
| Primary PCI           | 5.217  | 2.311  | 11.780  | <0.001 |
| pH                    | 21.524 | 2.459  | 188.428 | 0.006  |

Abbreviations: CAHP, cardiac arrest hospital prognosis; CI, confidence interval; OR, odds ratio; PCI, percutaneous cardiovascular interventions.

**Supplementary Figure S1** Receiver operating curve for cardiac arrest hospital prognosis (CAHP) and MIRACLE<sub>2</sub>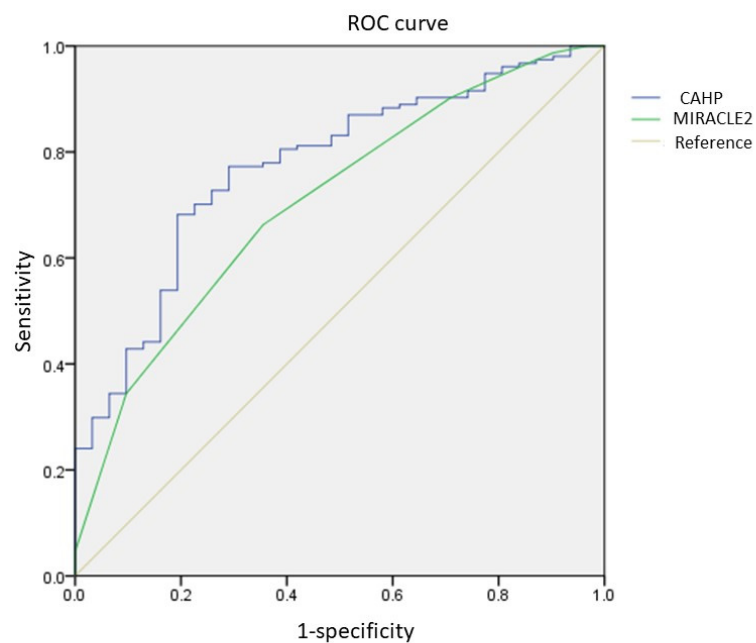

Comparison of discrimination performance for CAHP and MIRACLE<sub>2</sub>. The area under the curve (AUC) for CAHP was 0.773 (0.688 – 0.858,  $p < 0.001$ ), and that AUC for MIRACLE<sub>2</sub> was 0.773 (0.688–0.858,  $p < 0.001$ ).
